# Supplementary material for: Melanopsin, a Canonical Light Receptor, Mediates Thermal Activation of Clock Genes
Source: PubMed Central journal article supplement (PMC5656685; doi:10.1038/s41598-017-13939-3), 2017-10-25
Supplement: 41598_2017_13939_MOESM1_ESM.pdf [file 41598_2017_13939_MOESM1_ESM.pdf]

## **Melanopsin, a Canonical Light Receptor, Mediates Thermal Activation of Clock Genes**

Maria Nathália Moraes<sup>1\*</sup>, Leonardo Vinícius Monteiro de Assis<sup>1\*</sup>, Keila Karoline Magalhães-Marques<sup>1</sup>, Maristela Oliveira Poletini<sup>2</sup>, Leonardo Henrique Ribeiro Graciani de Lima<sup>1</sup>, Ana Maria de Lauro Castrucci<sup>1,3</sup>

<sup>1</sup> Department of Physiology, Institute of Biosciences, University of São Paulo, São Paulo, Brazil

<sup>2</sup> Department of Physiology and Biophysics, Institute of Biological Sciences, Federal University of Minas Gerais, Minas Gerais, Brazil.

<sup>3</sup> Department of Biology, University of Virginia, Charlottesville, VA, USA

\*Moraes, M.N. and de Assis, L.V.M contributed equally to this paper.

**#Corresponding author:** Ana Maria de Lauro Castrucci  
Departamento de Fisiologia  
Instituto de Biociências  
Universidade de São Paulo  
R. do Matão, trav. 14, no. 101  
São Paulo, 05508-900, Brazil  
Telephone: 5511-3091-7523  
Email: [amdicast@ib.usp.br](mailto:amdicast@ib.usp.br)

### Heat stimulus is ineffective in free-running Melan-a cells

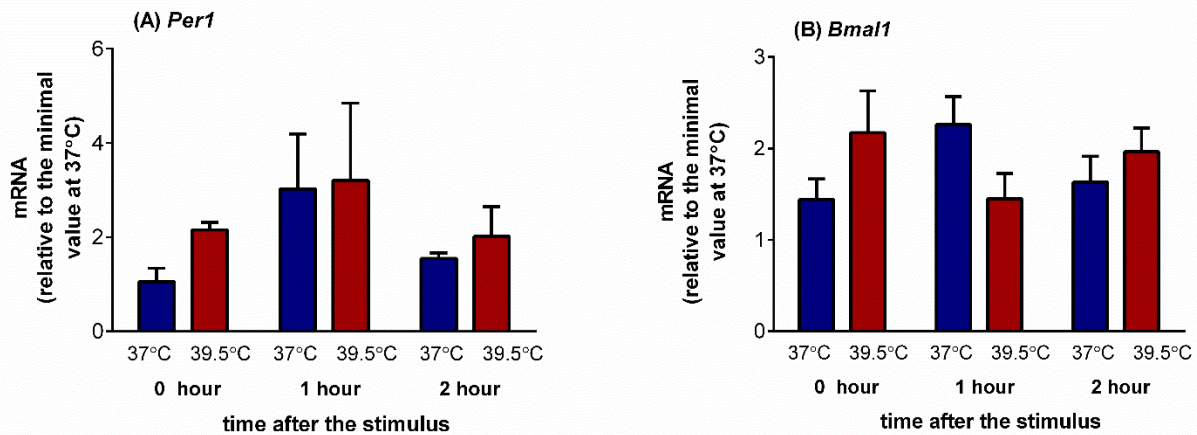

**Supplementary Figure 1. Expression of *Per1* (A) and *Bmal1* (B) in non-synchronized murine Melan-a melanocytes after heat stimulus (39.5°C).** Melan-a cells were seeded at the density of  $10^6$  in 25 cm<sup>2</sup> flasks, and kept for 3 days in constant dark and temperature (37°C). In the beginning of the 4th day, Melan-a cells were heat stimulated (39.5°C) during one h. Total RNA was extracted immediately, 1 and 2 h after the end of the stimulus. Values are shown as mean  $\pm$  SEM of each gene transcript normalized by 18S ribosomal RNA and expressed relative to the minimal value at 37°C (N=3-6). Statistical analysis was performed by Two-way ANOVA followed by Bonferroni post-test.
